# Supplementary material for: Competitive Exclusion Is a Major Bioprotective Mechanism of Lactobacilli against Fungal Spoilage in Fermented Milk Products
Source: PubMed Central journal article supplement (PMC7082583; doi:10.1128/aem.02312-19), 2020-03-18
Supplement: AEM.02312-19-s0001.pdf [file AEM.02312-19-s0001.pdf]

Supplemental material to:

## **Competitive exclusion is a major bioprotective mechanism of lactobacilli against fungal spoilage in fermented milk products**

Solvej Siedler<sup>a\*\*</sup>, Martin Holm Rau<sup>a\*</sup>, Susanne Bidstrup<sup>a</sup>, Justin M. Vento<sup>b</sup>,

Stina D. Aunbjerg Nielsen<sup>c</sup>, Elleke F. Bosma<sup>a</sup>, Laura F. McNair<sup>d</sup>, Chase L. Beisel<sup>b,e,f</sup>, Ana

Rute Neves<sup>a</sup>

<sup>a</sup> Discovery, R&D, Chr. Hansen A/S, Bøge Allé 10-12, 2970 Hørsholm, Denmark

<sup>b</sup> Department of Chemical and Biomolecular Engineering, North Carolina State University, Raleigh, NC 27695, USA

<sup>c</sup> Global Application, Chr. Hansen A/S, Bøge Allé 10-12, 2970 Hørsholm, Denmark

<sup>d</sup> Department of Drug Design and Pharmacology, University of Copenhagen, Universitetsparken 2, Copenhagen, Denmark

<sup>e</sup> Helmholtz Institute for RNA-based Infection Research (HIRI), Helmholtz Center for Infection Research, Würzburg, Germany

<sup>f</sup> Medical Faculty, University of Würzburg, Würzburg, Germany

Running Head: Competitive exclusion by lactobacilli

#Address correspondence to S.S.

\* S. S. and M. H. R. contributed equally to this work

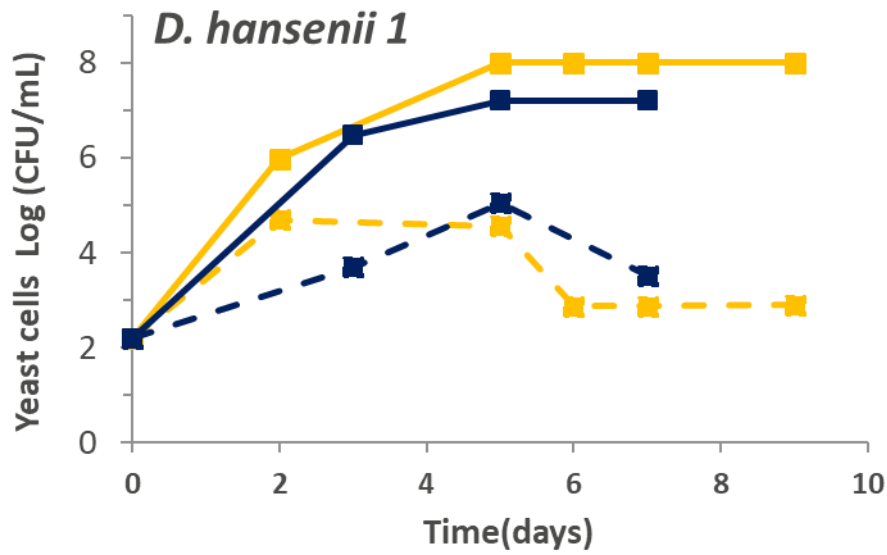

**Figure S1:** Comparison of *D. hansenii* Strain 1 growth in yogurt (yellow symbols) and its aqueous phase (blue symbols) with (dotted line) and without (solid line) bioprotective culture. *D. hansenii* was inoculated (100 cells/ml) and growth was followed by spotting dilution rows on selective YGC plates to count the yeast colonies at the indicated time points after inoculation. CFU, colony forming units

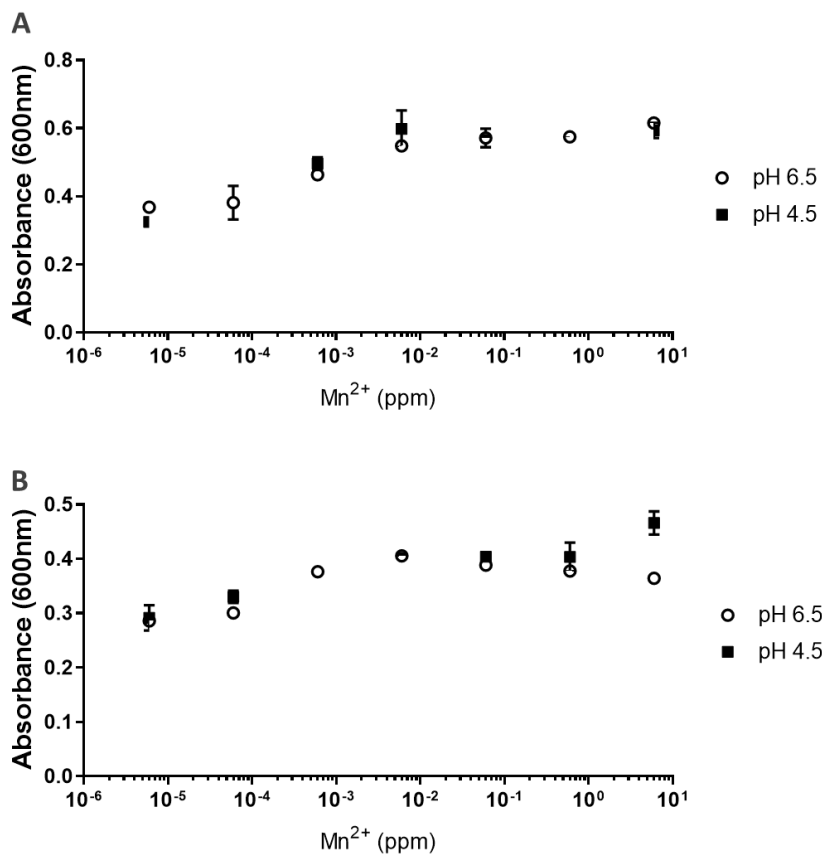

**Figure S2:** Effect of manganese concentration on yeast growth. Absorbance measurements of *D. hansenii* Strain 1 (A) and Strain 2 (B) after growth in a chemically defined medium<sup>1</sup> (CDM) as a function of manganese concentration. Two initial CDM pH setpoints were tested.

<sup>1</sup> Chemically defined medium. The CDM contains (per liter of demineralized water): 20 g glucose, 1 g Na-acetate, 0.6 g NH<sub>4</sub>-citrate, 5 g KH<sub>2</sub>PO<sub>4</sub>, 1 g K<sub>2</sub>HPO<sub>4</sub>, 0.24 g L-alanine, 0.5 g L-arginine, 0.125 g L-asparagine, 0.42 g L-aspartic acid, 0.13 g L-cysteine, 0.5 g L-glutamic acid, 0.175 g L-glycine, 0.15 g L-histidine, 0.21 g L-isoleucine, 0.475 g L-leucine, 0.44 g L-lysine, 0.125 g L-methionine, 0.275 g L-phenylalanine, 0.675 g L-proline, 0.34 g L-serine, 0.225 g L-threonine, 0.05 g L-tryptophan, 0.25 g L-tyrosine, 0.325 g L-valine, 0.01 g of each of the four nucleobases adenine, guanine, uracil and xanthine, 0.2 g MgCl<sub>2</sub>·6 H<sub>2</sub>O, 0.05 g CaCl<sub>2</sub>·2H<sub>2</sub>O, 5 mg Zn<sub>2</sub>SO<sub>4</sub>·7H<sub>2</sub>O, 2.5 mg CoSO<sub>4</sub>·7H<sub>2</sub>O, 2.5 mg CuSO<sub>4</sub>·5H<sub>2</sub>O, 2.5 mg (NH<sub>4</sub>)<sub>6</sub>Mo<sub>7</sub>O<sub>24</sub>·4H<sub>2</sub>O, 3 mg FeCl<sub>3</sub>·6H<sub>2</sub>O, 5 mg FeCl<sub>2</sub>·4H<sub>2</sub>O, 0.1 % Tween 80, 0.5 g ascorbic acid, 2 mg pyridoxine-HCl, 5 mg pyridoxamine-HCl, 10 mg p-aminobenzoic acid, 1 mg nicotinic acid, 1 mg Ca-DL-pantothenate, 1 mg thiamine, 1 mg lipoic acid, 1 mg riboflavin, 2.5 mg biotin, 1 mg folic acid and has a final pH at 5.6.

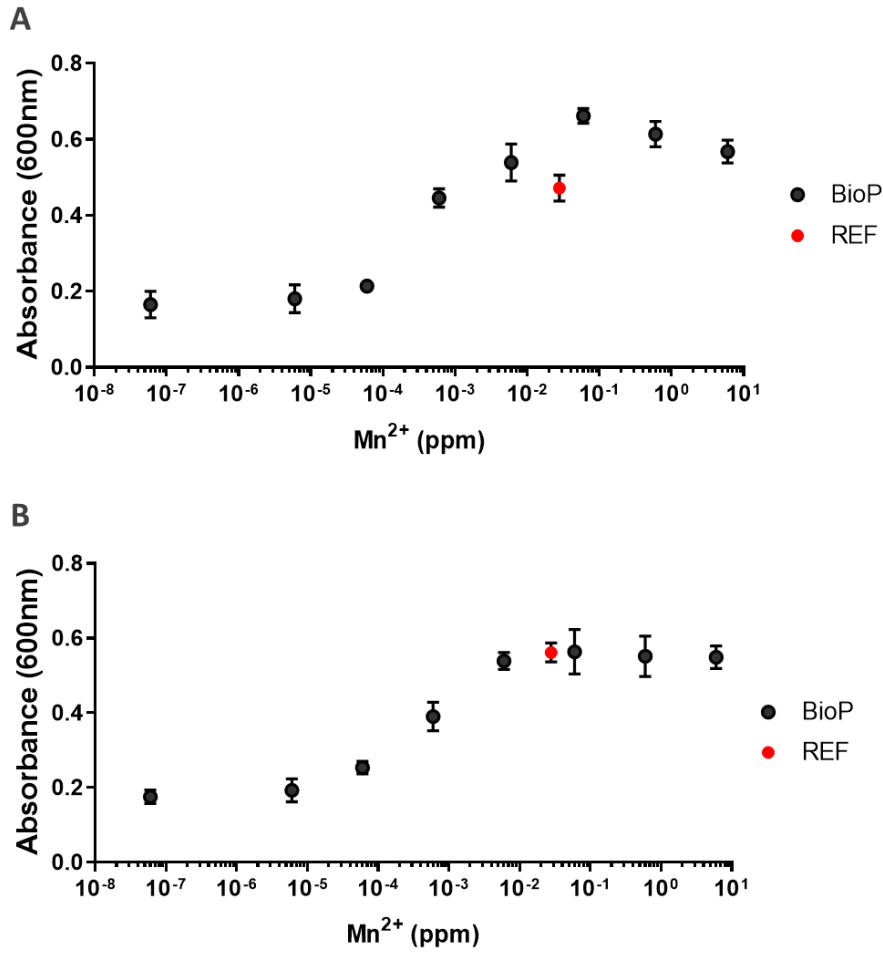

**Figure S3:** Effect of manganese addition on yeast growth in BioP AQ phase. Absorbance measurements of *D. hansenii* Strain 1 (**A**) and Strain 2 (**B**) after 7 days of incubation at 17°C in AQ phase. Influence of Mn<sup>2+</sup> addition to BioP AQ phase (black), compared to reference (REF) yoghurt aqueous phase (red) without any added manganese. Average and standard deviation of technical replicates n=6 (**A**) and n=3 (**B**) are shown.

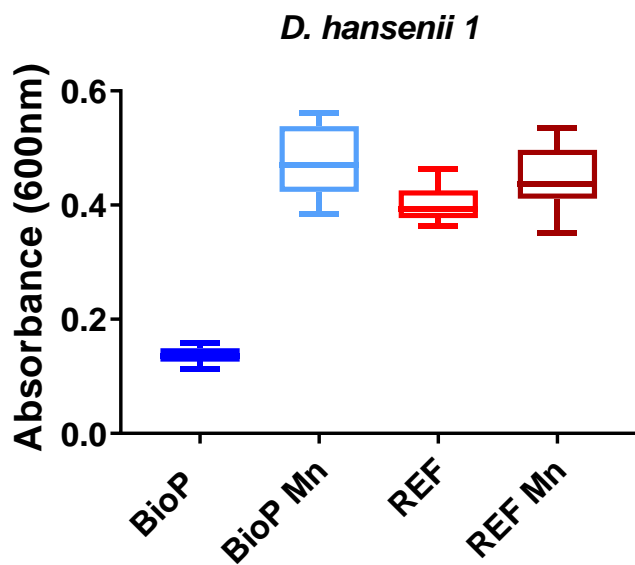

**Figure S4:** *D. hansenii* Strain 1 growth in REF AQ and BioP AQ without (dark blue) and with (light blue) the addition of 0.6 mg/L manganese and in REF AQ without (light red) and with (dark red) manganese addition after 5 days of incubation at 17°C. Box and whiskers of 6-9 replicates are shown.

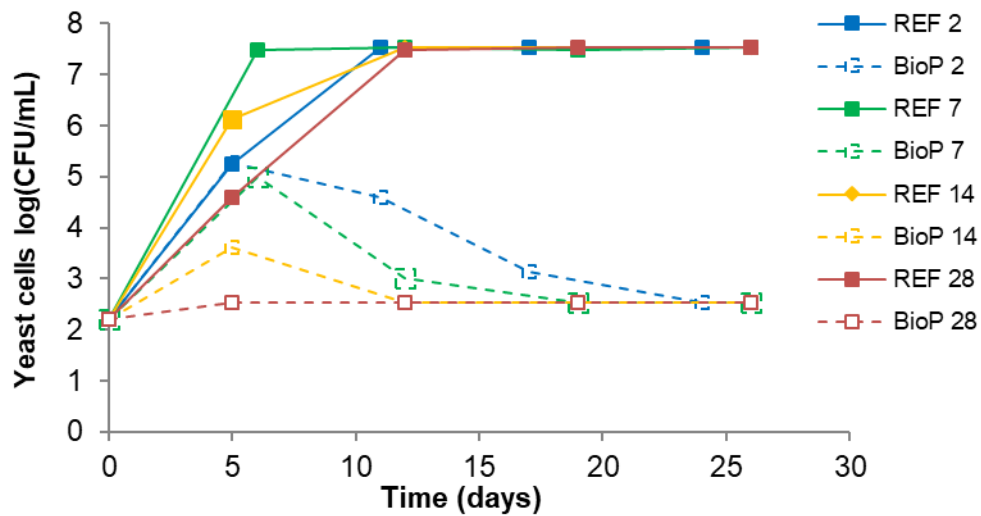

**Figure S5:** Change in bioactivity of BioP containing yogurt after storage, *D. hansenii* was inoculated (100 cells/ml) at different time points after yogurt production (blue, 2 days; green, 7 days; yellow, 14 days and red 28 days). Yogurt was produced with (dotted line) and without (solid line) BioP. The inoculated yogurt was incubated at 7°C and *D. hansenii* growth was followed by spotting dilution rows on selective YGC plates to count the yeast colonies at the indicated time points after inoculation.

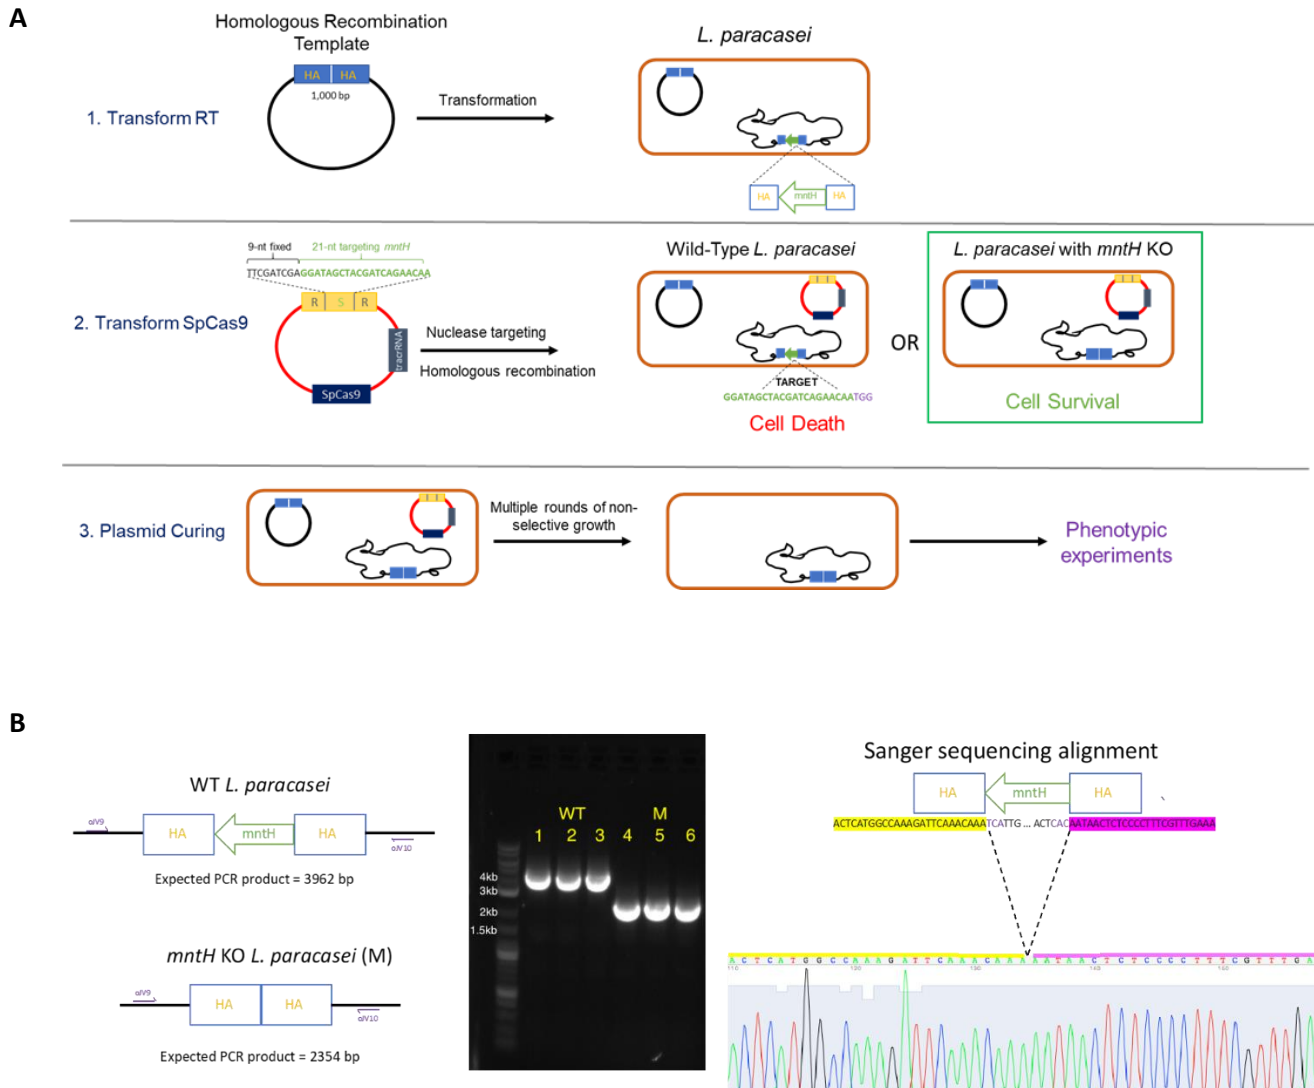

**Figure S6:** CRISPR-Cas9 genome editing in *L. paracasei* to delete the *mntH1* gene. **(A)** Scheme to generate a clean knockout of the *mntH1* gene using a homologous recombination (HR) template and CRISPR-Cas9 shuttle vectors. First, a shuttle vector harboring a recombinering template containing 500-bp homology arms on either side of the *mntH1* coding region was transformed into *L. paracasei*. Then, another shuttle vector encoding SpCas9, a tracrRNA, and a single-spacer CRISPR array targeting *mntH1* was transformed into the HR template strain to remove any unedited cells. Plasmids were cured from the mutant strains by non-selective growth in MRS media and on agar plates before the resulting mutant was subjected to phenotypic experiments. **(B)** Validation of the *mntH1* deletion via gel electrophoresis and Sanger sequencing. (Left) after transforming the targeting CRISPR-Cas9 shuttle vector, colonies were screened by cPCR that amplifies from the genome of *L. paracasei* but not the plasmid with the HR template. (Center) samples 1-3 on the gel show the PCR product obtained from the WT genome while Samples 4-6 show the PCR product obtained from a mutant (M) strain. (Right) the PCR product from the mutant strain was then subjected to Sanger sequencing to confirm that the start codon through the stop codon of *mntH1* was successfully deleted.

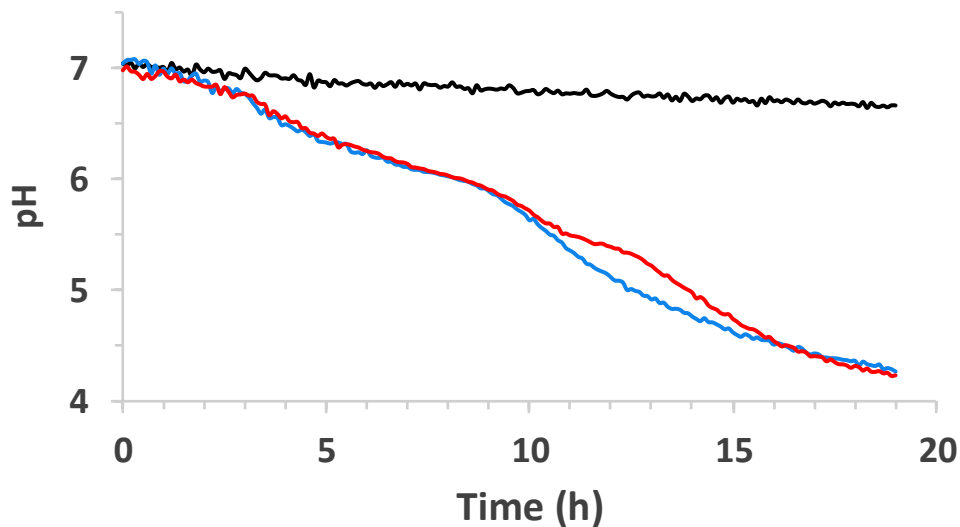

**Figure S7:** Acidification profile of BioP Strain B (blue) and its  $\Delta mntH1$  mutant (red) and a control of milk, which had not been inoculated (black). Averages of 3 replicates are shown.

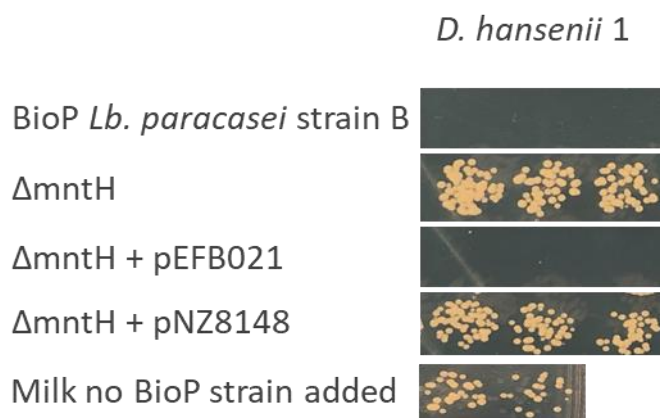

**Figure S8:** Influence of complementation of the  $\Delta mntH1$  mutant on its bioactivity. Milk was fermented by BioP *Lb. paracasei* strain B, its  $\Delta mntH1$  mutant and the  $\Delta mntH1$  mutant harboring the empty plasmid ( $\Delta mntH1$  + pNZ8148) or a plasmid containing the *mntH1* gene under its own promoter ( $\Delta mntH1$  + pEFB021). Afterwards, *D. hansenii* 1 was inoculated (20 cell) and after 4 days of incubation at 17°C a dilution row was spotted on selective YGC agar plates to analyze the yeast growth.



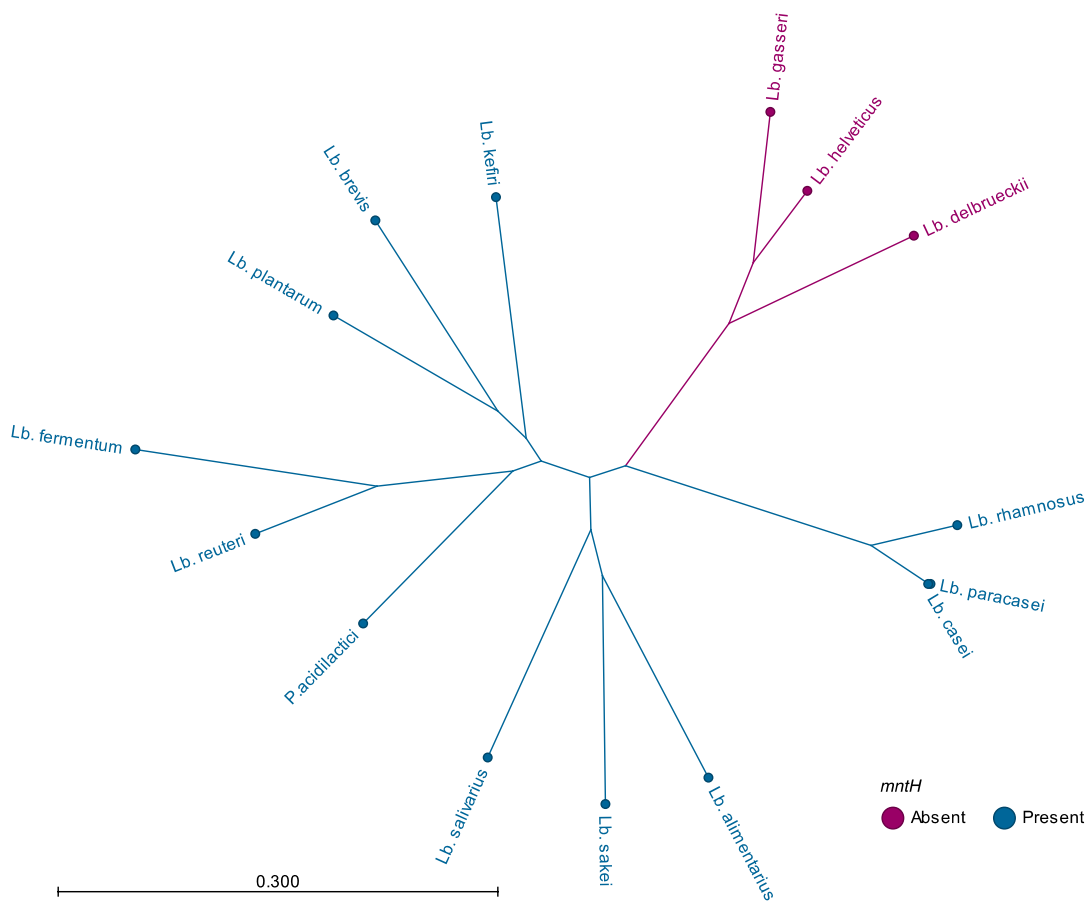

**Figure S9:** Phylogenetic tree of the assayed lactobacilli with genomic *mntH* gene absence or presence denoted by red or blue color, respectively. Workflow of phylogenetic inference is described in Text S1.

**Table S1: Sample-normalized and strain-normalized counts for all manganese transport-related genes and top10 expressed genes**

| ID            | Function                                       | BioP 4h | BioP 6 h | BioP 24 h | Strain A and Strain B <sup>a</sup> | Strain A <sup>a</sup> | Strain B <sup>a</sup> | Strain C <sup>a,b</sup> |
|---------------|------------------------------------------------|---------|----------|-----------|------------------------------------|-----------------------|-----------------------|-------------------------|
| Strain_A_1992 | Manganese transport protein MntH               | 18      | 26       | 3         | 72                                 | 86                    | NA                    | NA                      |
| Strain_A_2430 | Manganese transport protein MntH               | 948     | 6551     | 1028      | 18053                              | 5170                  | NA                    | NA                      |
| Strain_B_31   | Manganese transport protein MntH               | 241     | 44       | 249       | 69                                 | NA                    | 95                    | 178                     |
| Strain_B_959  | Manganese transport protein MntH               | 25      | 26       | 36        | 41                                 | NA                    | 43                    | 67                      |
| Strain_B_2310 | Manganese transport protein MntH               | 1208    | 9838     | 8543      | 15442                              | NA                    | 10907                 | 555                     |
| Strain_A_2438 | Manganese ABC transporter protein SitA         | 335     | 187      | 21        | 516                                | 250                   | NA                    | NA                      |
| Strain_A_2439 | Manganese ABC transporter protein SitD         | 318     | 184      | 19        | 506                                | 228                   | NA                    | NA                      |
| Strain_A_2440 | Manganese ABC transporter protein SitB         | 321     | 178      | 13        | 491                                | 191                   | NA                    | NA                      |
| Strain_B_2320 | Manganese ABC transporter protein SitA         | 227     | 1241     | 35        | 1949                               | NA                    | 302                   | 56                      |
| Strain_B_2321 | Manganese ABC transporter protein SitD         | 179     | 884      | 26        | 1388                               | NA                    | 211                   | 42                      |
| Strain_B_2322 | Manganese ABC transporter protein SitB         | 191     | 928      | 30        | 1456                               | NA                    | 220                   | 40                      |
| Strain_A_976  | Glyceraldehyde-3-phosphate dehydrogenase       | 10275   | 10375    | 22218     | 28582                              | 25938                 | NA                    | NA                      |
| Strain_A_487  | NADH peroxidase Npx                            | 5244    | 7044     | 1722      | 19406                              | 7175                  | NA                    | NA                      |
| Strain_A_1363 | Translation elongation factor Tu               | 8191    | 6603     | 1954      | 18195                              | 13773                 | NA                    | NA                      |
| Strain_A_2430 | Manganese transport protein MntH               | 948     | 6551     | 1028      | 18053                              | 5170                  | NA                    | NA                      |
| Strain_A_2432 | FIG00743426: hypothetical protein              | 2783    | 6743     | 5038      | 18577                              | 11550                 | NA                    | NA                      |
| Strain_A_1651 | Oligopeptide ABC transporter OppA              | 3089    | 6151     | 301       | 16947                              | 21545                 | NA                    | NA                      |
| Strain_A_2541 | L-lactate dehydrogenase                        | 3748    | 5159     | 1602      | 14214                              | 9272                  | NA                    | NA                      |
| Strain_A_979  | Enolase                                        | 3479    | 3666     | 5322      | 10103                              | 6352                  | NA                    | NA                      |
| Strain_A_1395 | Pyruvate kinase                                | 1546    | 3197     | 2751      | 8811                               | 5227                  | NA                    | NA                      |
| Strain_A_1412 | DNA-binding protein HBSu                       | 4064    | 3253     | 2313      | 8965                               | 10756                 | NA                    | NA                      |
| Strain_B_1921 | Glyceraldehyde-3-phosphate dehydrogenase       | 15383   | 23054    | 42198     | 36189                              | NA                    | 38272                 | NA                      |
| Strain_B_1282 | Oligopeptide ABC transporter OppA              | 3037    | 14088    | 2287      | 22116                              | NA                    | 24149                 | NA                      |
| Strain_B_2312 | FIG00743426: hypothetical protein              | 3399    | 13596    | 23936     | 21342                              | NA                    | 22030                 | NA                      |
| Strain_B_2635 | Molecular chaperone (small heat shock protein) | 20483   | 11961    | 13010     | 18775                              | NA                    | 30622                 | NA                      |
| Strain_B_1560 | Translation elongation factor Tu               | 6499    | 10528    | 4888      | 16525                              | NA                    | 17731                 | NA                      |
| Strain_B_1513 | DNA-binding protein HBSu                       | 7237    | 10615    | 7568      | 16662                              | NA                    | 16710                 | NA                      |
| Strain_B_2310 | Manganese transport protein MntH               | 1208    | 9838     | 8543      | 15442                              | NA                    | 10907                 | NA                      |
| Strain_B_2434 | L-lactate dehydrogenase                        | 5329    | 7977     | 11579     | 12521                              | NA                    | 13460                 | NA                      |
| Strain_B_1918 | Enolase                                        | 7896    | 5590     | 9580      | 8774                               | NA                    | 9875                  | NA                      |
| Strain_B_1769 | Cold shock protein CspA                        | 2223    | 5054     | 7622      | 7933                               | NA                    | 5753                  | NA                      |

<sup>a</sup> Strain-normalized counts, not sample-normalized counts

<sup>b</sup> *Lb. paracasei* Strain C reads mapped to *Lb. paracasei* Strain B genes

## **Text S1**

### **Phylogeny of *Lactobacillus* strains**

The genomes of the selected *Lactobacillus* strains were annotated using RAST (1) and core genes identified using Roary (2) with a minimum of 80 % identity. The core genes were aligned using Prank (3), poorly aligned positions eliminated using gblocks (4) and the Maximum-Likelihood phylogeny inferred using RAxML-NG (5) with the GTR GAMMA (GTR+F0+G) model, 20 random starting trees and 100 bootstrap replicates. The phylogenetic tree was constructed using CLC Genomics Workbench v11 (CLC Bio A/S). Presence of genome encoded MntH proteins was identified using tblastn with BioP MntH and prokaryotic TCDB (6) 2.A.55 Nramp family transporters as queries.

### **Plasmid generation**

The Cas9 targeting plasmid pJV114 was generated from *E. coli*-*Lactobacilli* shuttle vector pCB578 containing SpCas9, a tracrRNA, and a repeat-spacer-repeat array (7). To clone a new spacer targeting *mntH1*, pCB578 was digested with PvuI and NotI enzymes, and oligos oJV1-2 containing a 21-nt target-derived spacer and the 3' repeat were phosphorylated with T4 PNK and annealed together before being ligated into this digested backbone with Instant Sticky-end Ligase Master Mix (NEB CN# M0370S). The resulting spacer includes 9 fixed nts at the 5' end that do not participate in targeting, resulting in a 30-nt spacer that is processed as part of CRISPR RNA biogenesis. The ligation mix was transformed into NEB 5-alpha Competent *E. coli* (NEB CN #C2987I) and plated on LB agar containing 300 µg mL<sup>-1</sup> erythromycin. Colonies were screened with cPCR primers oJV3-4 and Sanger sequenced with oJV4 to confirm the correct spacer sequence.

The homologous recombination template plasmid pJV91 was generated in two steps beginning with the *E. coli*-*Lactobacilli* shuttle vector pCB591 (7). First, the *mntH1* gene was amplified from the *Lb. paracasei* genome along with 500-bp homology arms on either side, and the PCR fragment was inserted into pCB591 using the Gibson assembly kit (NEB CN# E2611S) to generate pJV88. Then,

the *mntH1* gene was deleted from pJV88 using the Q5 site-directed mutagenesis kit (NEB CN# E0554S) following the manufacturer's instructions along with primers oJV5-6 to generate pJV91. NEB 5-alpha Competent *E. coli* cells were used for both cloning steps, and primers oJV7-8 were used for cPCR of *E. coli* colonies. Gel electrophoresis and Sanger sequencing with oJV7-8 were used to confirm the correct clones.

The *mntH1*-reconstitution plasmid pEFB021 was generated via 2-part Gibson assembly. The backbone of expression vector pNZ8148 without the *NisA* promoter but including the *PepN* terminator was amplified using oEFB0072+0106. For pEFB021, the native 207-bp *mntH1* promoter followed by the *mntH1* gene were amplified from the *Lb. paracasei* genome using oEFB0107+0108, which contained overhangs with oEFB0072+0106. The two fragments were assembled using the NEBuilder HiFi DNA Assembly Master Mix (NEB #E2621S). A clean-up step was performed using the Monarch PCR & DNA Cleanup Kit (NEB #T103S), in which elution was performed with 20  $\mu$ L MiliQ water. 5  $\mu$ L of the cleaned-up DNA was then transformed to electrocompetent *L. lactis* MG1363 (8) and plated on GM17-agar containing 10  $\mu$ /mL chloramphenicol. Colonies were screened by PCR with primers oEFB0055+0056 and Sanger-sequenced with the same primers to confirm correct constructs.

### **Transformation of plasmids**

The transformation protocol used for mutant generation in *Lb. paracasei* was adapted from Song et al (9). Briefly, overnight cultures were back-diluted in 50 mL of MRS supplemented with 1% glycine and grown until OD<sub>600</sub> reached 0.6-0.8. Then, the cells were harvested before being washed twice with ice-cold 10% glycerol. Finally, cells were resuspended in 500  $\mu$ L of ice-cold 10% glycerol. For all transformations, 100  $\mu$ L of this suspension and 1  $\mu$ g of plasmid DNA was added to a 2-mm gap cuvette and transformed at 2.0 kV, 200  $\Omega$  resistance, and 25  $\mu$ F capacitance. Following electroporation, 900  $\mu$ L of MRS supplemented with 500 mM sucrose, 2 mM CaCl<sub>2</sub>, and 20 mM MgCl<sub>2</sub> was added to the cuvette and transferred to a sterile tube and incubated at 37 °C without shaking for 3 hours. Then, 250  $\mu$ L of this recovery was plated on MRS agar containing any necessary antibiotics,

and the plates were incubated at 37 °C for 3 days before counting colonies. Chloramphenicol and erythromycin concentrations were both 10 µg mL<sup>-1</sup> in MRS liquid media and agar.

### **Genome editing**

To perform the genomic edit, the homologous recombination template plasmid pJV91 was isolated from the non-methylated *E. coli* strain EC135 to improve transformation efficiency (7, 10) and transformed into *Lb. paracasei*. Colonies containing pJV91 were selected for by plating on MRS agar supplemented with chloramphenicol. A single colony was inoculated in liquid culture and cells were made electrocompetent using the previously described methods. Then, the targeting CRISPR-Cas9 plasmid pJV114 was passaged through EC135 and transformed into the homologous recombination template strain. The recovered cells were plated on MRS agar supplemented with erythromycin to select only for the CRISPR-Cas9 plasmid, and a significant increase in CFU was observed when transforming pJV114 into the recombination template strain compared to the WT strain. Colonies were screened using cPCR with primers oJV9-10 that would only amplify from the *Lb. paracasei* genome, and the PCR products were subjected to gel electrophoresis and Sanger sequencing with oJV11 to validate the genomic deletion (**Fig S6**). Both plasmids were cured from the mutant *Lb. paracasei* strain by cycling between culturing a colony in MRS media and plating the culture on MRS agar, both without antibiotics. After each round of plating, single colonies were picked and grown in MRS media and replica plated on MRS agar supplemented with either chloramphenicol or erythromycin. This cycle was repeated until a mutant strain was sensitive to either antibiotic. Finally, the resulting mutant strain was subjected to the phenotypic experiments.

### Supplemental references:

1. Overbeek R, Olson R, Pusch GD, Olsen GJ, Davis JJ, Disz T, Edwards RA, Gerdes S, Parrello B, Shukla M, Vonstein V, Wattam AR, Xia F, Stevens R. 2014. The SEED and the Rapid Annotation of microbial genomes using Subsystems Technology (RAST). *Nucleic Acids Res* 42:D206-14.
2. Page AJ, Cummins CA, Hunt M, Wong VK, Reuter S, Holden MTG, Fookes M, Falush D, Keane JA, Parkhill J. 2015. Roary: rapid large-scale prokaryote pan genome analysis. *Bioinformatics* 31:3691–3693.
3. Löytynoja A, Goldman N. 2005. An algorithm for progressive multiple alignment of sequences with insertions. *Proc Natl Acad Sci U S A* 102:10557–62.
4. Talavera G, Castresana J, Kjer K, Page R, Sullivan J. 2007. Improvement of Phylogenies after Removing Divergent and Ambiguously Aligned Blocks from Protein Sequence Alignments. *Syst Biol* 56:564–577.
5. Kozlov AM, Darriba D, Flouri T, Morel B, Stamatakis A. 2019. RAxML-NG: a fast, scalable and user-friendly tool for maximum likelihood phylogenetic inference. *Bioinformatics* 35:4453–4455.
6. Saier MH, Reddy VS, Tsu B V., Ahmed MS, Li C, Moreno-Hagelsieb G. 2016. The Transporter Classification Database (TCDB): recent advances. *Nucleic Acids Res* 44:D372–D379.
7. Leenay RT, Vento JM, Shah M, Martino ME, Leulier F, Beisel CL. 2019. Genome Editing with CRISPR-Cas9 in *Lactobacillus plantarum* Revealed That Editing Outcomes Can Vary Across Strains and Between Methods. *Biotechnol J* 14:1700583.
8. Nickoloff JA, Holo H, Nes IF. 2003. Transformation of *Lactococcus* by Electroporation, p. 195–200. *In* *Electroporation Protocols for Microorganisms*. Humana Press.

9. Song X, Huang H, Xiong Z, Ai L, Yang S. 2017. CRISPR-Cas9D10A Nickase-Assisted Genome Editing in *Lactobacillus casei*. *Appl Environ Microbiol* 83:e01259-17.
10. Zhang G, Wang W, Deng A, Sun Z, Zhang Y, Liang Y, Che Y, Wen T. 2012. A Mimicking-of-DNA-Methylation-Patterns Pipeline for Overcoming the Restriction Barrier of Bacteria. *PLoS Genet* 8:e1002987.
